# Supplementary material
Source: Springer Nature journal article supplement (https://www.springermedizin.de/resource/supplementary/12875_2013_885_MOESM4_ESM.pdf/9435744)

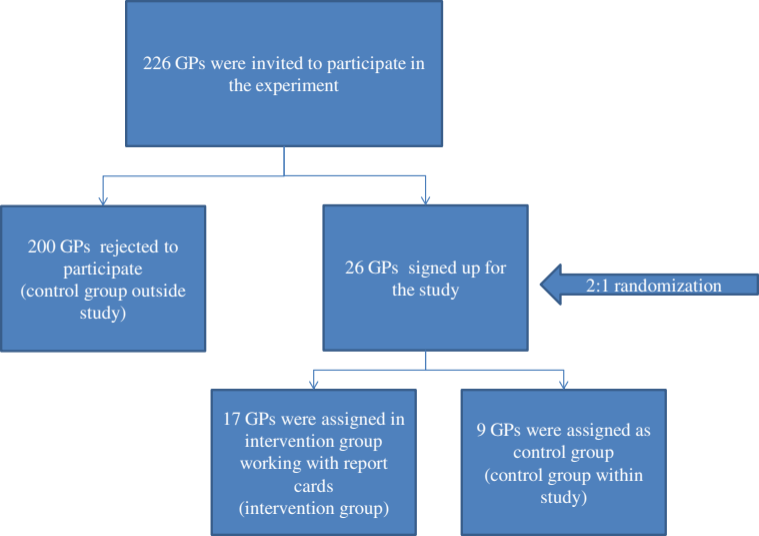

Supplement: MOESM4 [file 9435744]
